# Supplementary material for: In Situ Dispersion of Lignin in Polypropylene via Supercritical CO2 Extrusion Foaming: Effects of Lignin on Cell Nucleation and Foam Compression Properties
Source: MDPI journal article supplement (doi:10.3390/polym15081813), 2023-04-07
Supplement: s1 [file s1]

**Table S1.** Parameters used for fabricating PP foams with different densities.

| PP foam density, (g/cm <sup>3</sup> ) | 0.109 | 0.098 | 0.064 | 0.038 |
|---------------------------------------|-------|-------|-------|-------|
| CO <sub>2</sub> loading (%)           | 2     | 2     | 2.5   | 4     |
| Extruder throughput (kg/h)            | 7     | 7     | 5     | 7.5   |

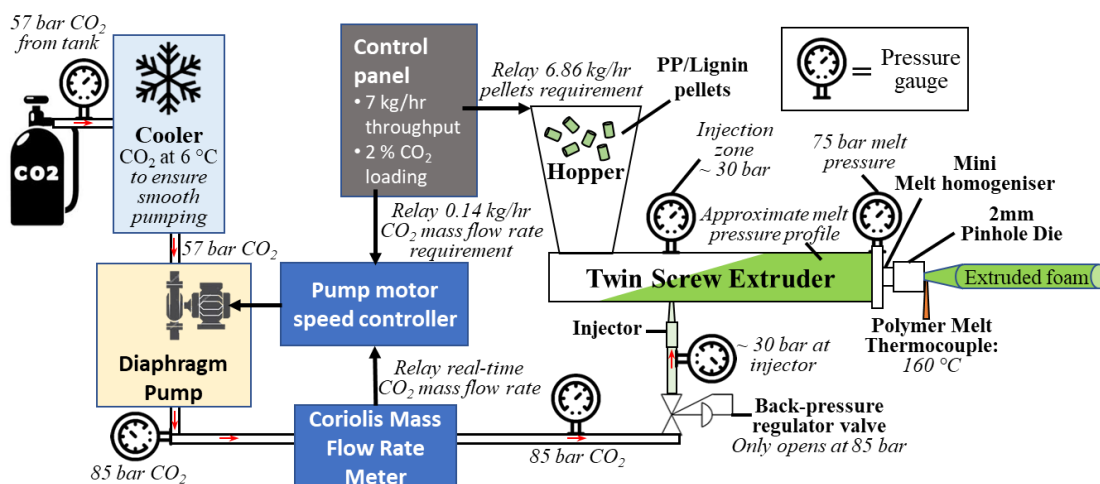

**Figure S1.** The setup of scCO<sub>2</sub> foam extruder.

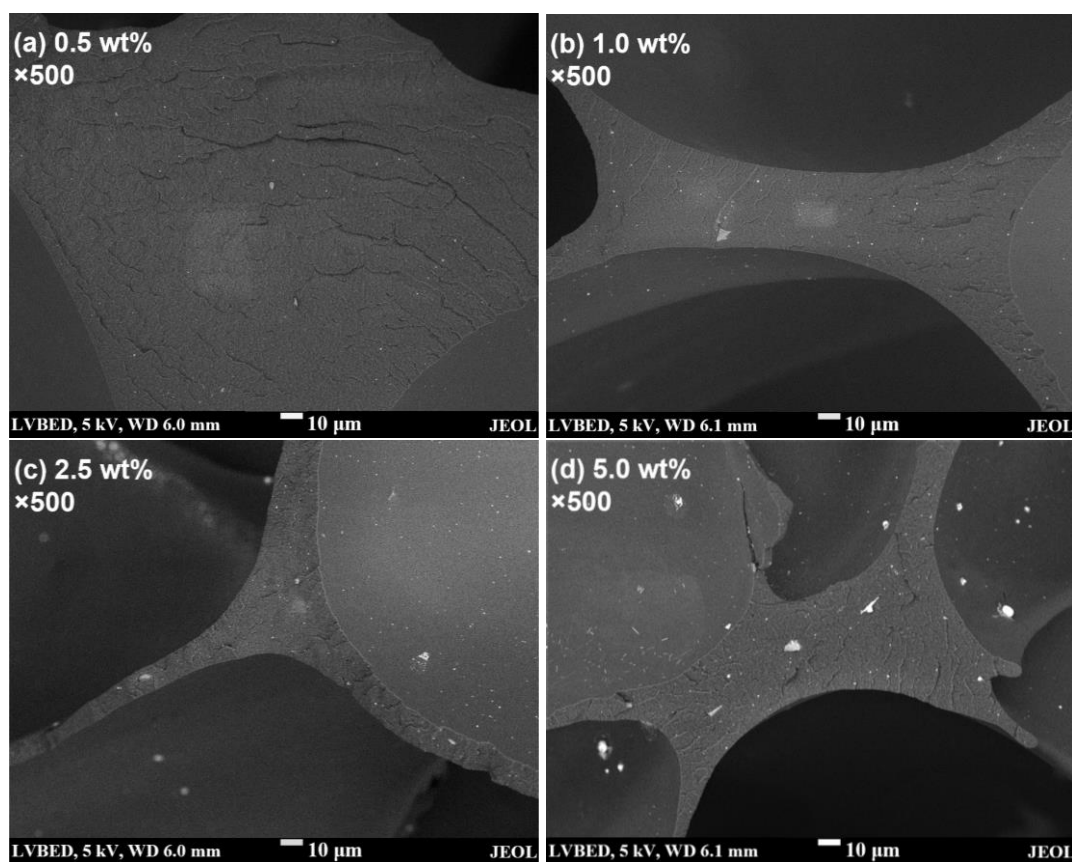

**Figure S2.** Example of SEM cross-sectional low magnification images of PP/lignin composite foams with (a) 0.5, (b) 1, (c) 2.5, and (d) 5 wt% of lignin used for lignin particle size distribution analysis of diameter  $\geq 1 \mu\text{m}$ .

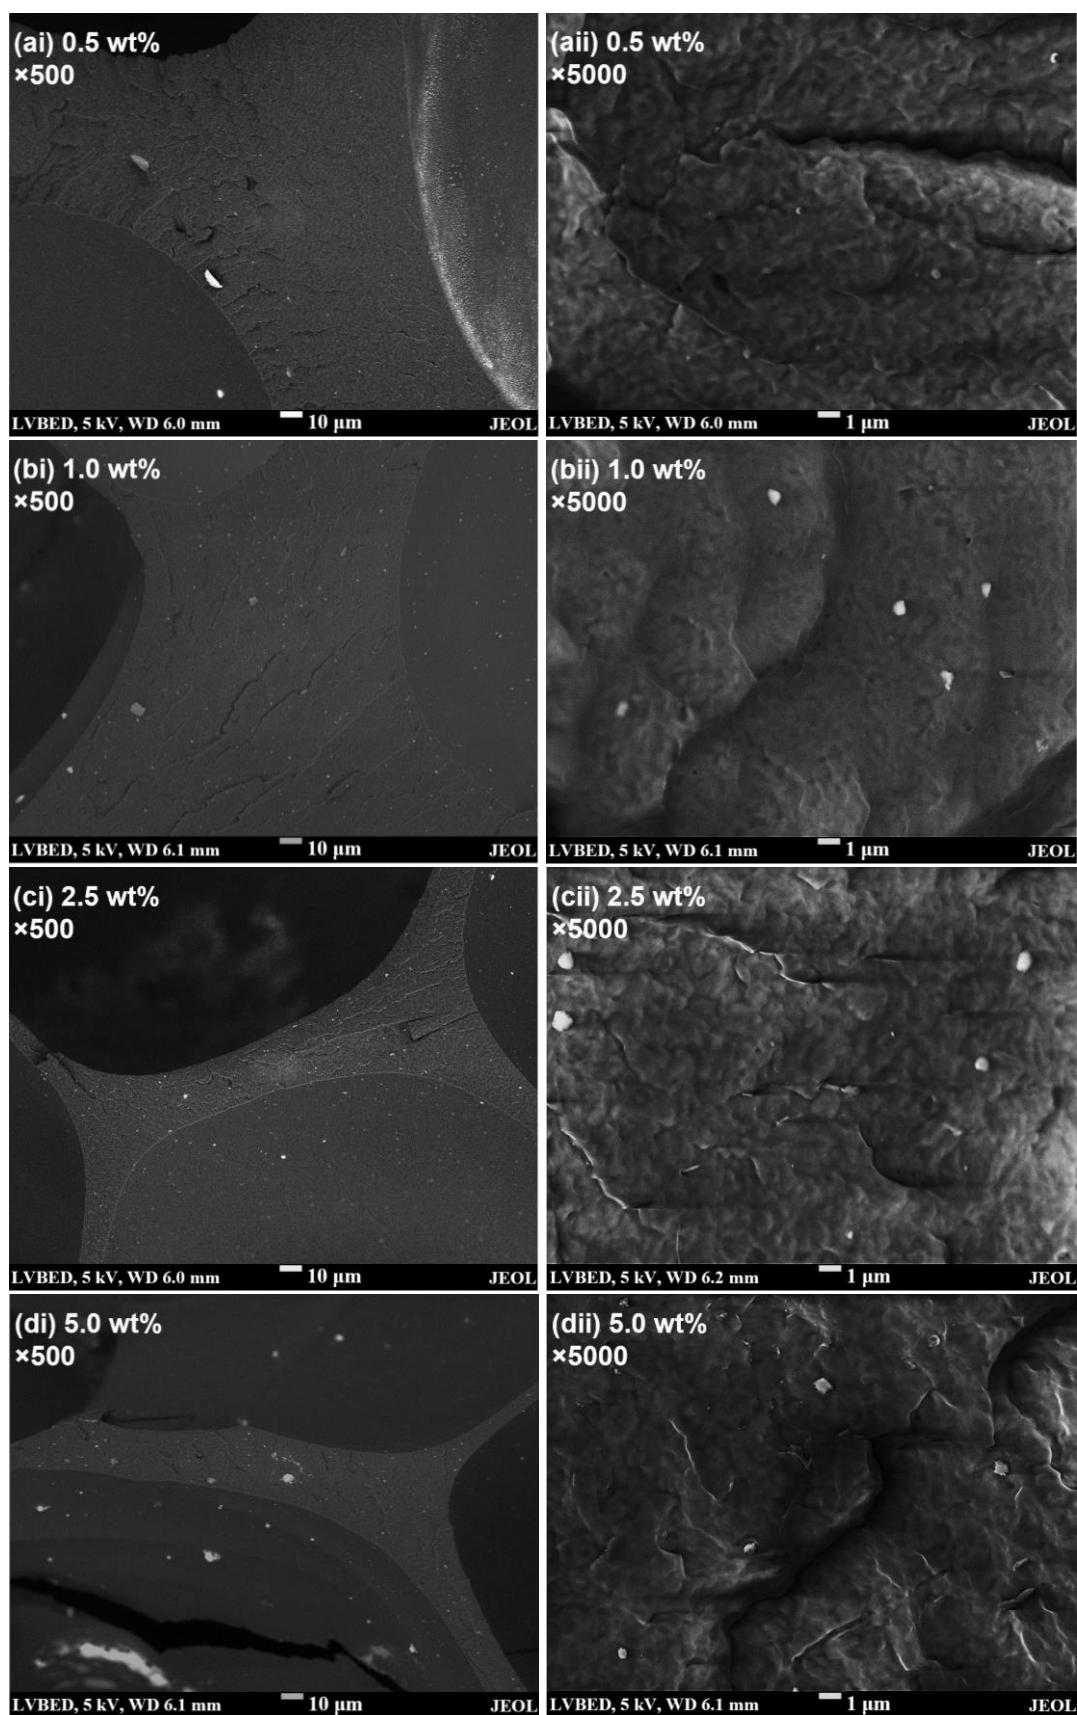

**Figure S3.** Further examples of SEM cross-sectional images of PP/lignin composite foam at (a) 0.5, (b) 1, (c) 2.5, and (d) 5 wt% used for lignin particle size distribution analysis of diameter (i)  $\geq 1 \mu\text{m}$  and (ii)  $< 1 \mu\text{m}$ .

**Table S2.** Crystallinity % and melting temperature of PP and PP/lignin foams.

| <b>Lignin loading (%)</b>       | 0.0   | 0.5   | 1.0   | 2.5   | 5.0   |
|---------------------------------|-------|-------|-------|-------|-------|
| <b>Crystallinity (%)</b>        | 39.8  | 40.1  | 38.8  | 40.4  | 39.6  |
| <b>Melting Temperature (°C)</b> | 159.1 | 159.0 | 159.1 | 158.7 | 158.5 |
